# Supplementary material for: Potential short-term losses of N 2 O and N 2 from high concentrations of biogas digestate in arable soils
Source: Copernicus journal article supplement (doi:10.5194/soil-3-161-2017), 2017-09-28
Supplement: Supplementary file 1 [file soil-3-161-2017-supplement.zip]

Archive with 7 entries (7 files):
- Fig5_ratio.xlsx
- soil-3-161-2017-supplement-title-page.pdf
- Fig7_CO2vsN2O.xlsx
- Fig4_N2.xlsx
- Fig6_DOCvsCO2.xlsx
- Fig3_N2O.xlsx
- Fig2_Nmin.xlsx
