# Supplementary material for: Potential short-term losses of N 2 O and N 2 from high concentrations of biogas digestate in arable soils
Source: Copernicus journal article supplement (doi:10.5194/soil-3-161-2017), 2017-09-28
Supplement: Supplementary file 1 [file soil-3-161-2017-supplement.zip › Fig2_Nmin.xlsx]

## Sheet: Tabelle1
soil	wfps	kg.N.ha	nh4.mean	nh4.sd	no3.mean	no3.sd
Clayey silt	35	0	0.876667	0.126787	2.56667	0.287533
Clayey silt	55	0	0.18	0.031225	4.95667	0.828689
Clayey silt	75	0	0.28	0.0739932	4.71	0.740084
Clayey silt	35	160	NA	NA	NA	NA
Clayey silt	55	160	8.96667	1.76443	4.98333	0.306105
Clayey silt	75	160	9.89333	2.72007	2.77	0.783071
Clayey silt	35	320	19.3967	0.740456	3.37667	0.410274
Clayey silt	55	320	14.6767	2.80116	3.22333	0.355211
Clayey silt	75	320	16.0667	1.23089	3.23333	0.0823104
Loamy sand	35	0	1	0.0540833	0.0533333	0.0132288
Loamy sand	55	0	0.95	0.119059	0.0533333	0.0360555
Loamy sand	75	0	0.85	0.0912414	0.236667	0.07
Loamy sand	35	160	17.04	2.0094	0.0333333	0.005
Loamy sand	55	160	17.1667	1.68451	0.0433333	0.0278388
Loamy sand	75	160	18.3567	0.819588	0.02	0.00866025
Loamy sand	35	320	28.88	0.837362	0.0333333	0.005
Loamy sand	55	320	27.3667	1.76627	0.0333333	0.01
Loamy sand	75	320	31.4033	2.30197	0.0233333	0.005
