# Supplementary material for: Potential short-term losses of N 2 O and N 2 from high concentrations of biogas digestate in arable soils
Source: Copernicus journal article supplement (doi:10.5194/soil-3-161-2017), 2017-09-28
Supplement: Supplementary file 1 [file soil-3-161-2017-supplement.zip › Fig3_N2O.xlsx]

## Sheet: Tabelle1
soil	day	kg.N.ha	wfps	mean	sd
Clayey silt	2	0	35	-0.000924786	0.00160178
Clayey silt	2	160	35	NA	NA
Clayey silt	2	320	35	0.00280931	0.00486586
Clayey silt	2	0	55	0.339097	0.0712569
Clayey silt	2	160	55	1.51198	0.580876
Clayey silt	2	320	55	1.2199	0.24107
Clayey silt	2	0	75	0.358675	0.0887513
Clayey silt	2	160	75	0.976446	0.0678571
Clayey silt	2	320	75	1.07968	0.217574
Clayey silt	4	0	35	0	0
Clayey silt	4	160	35	NA	NA
Clayey silt	4	320	35	0.0615175	0.0598809
Clayey silt	4	0	55	1.01539	0.235334
Clayey silt	4	160	55	6.2092	1.14856
Clayey silt	4	320	55	3.0043	0.821894
Clayey silt	4	0	75	1.09832	0.278607
Clayey silt	4	160	75	2.57866	1.03778
Clayey silt	4	320	75	2.16758	0.936027
Clayey silt	5	0	35	NA	NA
Clayey silt	5	160	35	NA	NA
Clayey silt	5	320	35	11.6866	2.00649
Clayey silt	5	0	55	0.0870466	0.0107527
Clayey silt	5	160	55	5.02518	1.01007
Clayey silt	5	320	55	1.0177	0.954283
Clayey silt	5	0	75	0.0801028	0.0166674
Clayey silt	5	160	75	1.66292	0.336759
Clayey silt	5	320	75	0.951201	0.257243
Loamy sand	2	0	35	0.00624051	0.0054313
Loamy sand	2	160	35	0.00645946	0.00581445
Loamy sand	2	320	35	-0.000115897	0.00212884
Loamy sand	2	0	55	0.00699305	0.00608564
Loamy sand	2	160	55	0.00118446	0.00205154
Loamy sand	2	320	55	0.00123365	0.00213674
Loamy sand	2	0	75	0.00268923	0.00465788
Loamy sand	2	160	75	0.00328654	0.00286306
Loamy sand	2	320	75	0.00112193	0.00194324
Loamy sand	4	0	35	0.000120933	0.00425991
Loamy sand	4	160	35	0.0412959	0.00176432
Loamy sand	4	320	35	0.025679	0.011795
Loamy sand	4	0	55	0.0164729	0.0100032
Loamy sand	4	160	55	0.109662	0.0897421
Loamy sand	4	320	55	0.0322978	0.00755808
Loamy sand	4	0	75	0.0349018	0.0125922
Loamy sand	4	160	75	0.00729784	0.0095972
Loamy sand	4	320	75	0.00266453	0.00234641
Loamy sand	5	0	35	0.0502158	0.0134695
Loamy sand	5	160	35	NA	NA
Loamy sand	5	320	35	0.876353	0.103537
Loamy sand	5	0	55	0.0848435	0.0480041
Loamy sand	5	160	55	NA	NA
Loamy sand	5	320	55	1.24274	0.662717
Loamy sand	5	0	75	1.27634	1.56074
Loamy sand	5	160	75	NA	NA
Loamy sand	5	320	75	NA	NA
