# Supplementary material for: Potential short-term losses of N 2 O and N 2 from high concentrations of biogas digestate in arable soils
Source: Copernicus journal article supplement (doi:10.5194/soil-3-161-2017), 2017-09-28
Supplement: Supplementary file 1 [file soil-3-161-2017-supplement.zip › Fig4_N2.xlsx]

## Sheet: Tabelle1
soil	day	kg.N.ha	wfps	mean	sd
Clayey silt	2	0	35	0	0
Clayey silt	2	160	35	NA	NA
Clayey silt	2	320	35	0	0
Clayey silt	2	0	55	1.3133	0.124906
Clayey silt	2	160	55	0.792879	0.516821
Clayey silt	2	320	55	1.30634	0.293083
Clayey silt	2	0	75	1.36032	0.38906
Clayey silt	2	160	75	1.36087	0.498311
Clayey silt	2	320	75	1.35898	0.0954018
Clayey silt	4	0	35	0	0
Clayey silt	4	160	35	NA	NA
Clayey silt	4	320	35	0	0
Clayey silt	4	0	55	1.49353	0.226018
Clayey silt	4	160	55	2.92408	0.586864
Clayey silt	4	320	55	2.80699	0.734476
Clayey silt	4	0	75	1.32607	0.174328
Clayey silt	4	160	75	3.7729	1.63886
Clayey silt	4	320	75	3.30087	0.756336
Clayey silt	5	0	35	0	0
Clayey silt	5	160	35	NA	NA
Clayey silt	5	320	35	1.7768	0.0713771
Clayey silt	5	0	55	1.81772	0.25281
Clayey silt	5	160	55	9.27684	3.00019
Clayey silt	5	320	55	5.38764	2.17779
Clayey silt	5	0	75	1.90149	0.108374
Clayey silt	5	160	75	4.61168	1.71766
Clayey silt	5	320	75	6.72538	0.753914
Loamy sand	2	0	35	0	0
Loamy sand	2	160	35	0	0
Loamy sand	2	320	35	0	0
Loamy sand	2	0	55	0	0
Loamy sand	2	160	55	0	0
Loamy sand	2	320	55	0	0
Loamy sand	2	0	75	0	0
Loamy sand	2	160	75	0	0
Loamy sand	2	320	75	0	0
Loamy sand	4	0	35	0	0
Loamy sand	4	160	35	0.130488	0.226012
Loamy sand	4	320	35	0	0
Loamy sand	4	0	55	0.0662852	0.114809
Loamy sand	4	160	55	0	0
Loamy sand	4	320	55	0.520641	0.371292
Loamy sand	4	0	75	0	0
Loamy sand	4	160	75	0	0
Loamy sand	4	320	75	0	0
Loamy sand	5	0	35	3.33832	0.460763
Loamy sand	5	160	35	NA	NA
Loamy sand	5	320	35	22.8653	5.74189
Loamy sand	5	0	55	5.98994	2.16659
Loamy sand	5	160	55	NA	NA
Loamy sand	5	320	55	35.142	8.57452
Loamy sand	5	0	75	9.16501	0.358637
Loamy sand	5	160	75	NA	NA
Loamy sand	5	320	75	26.7728	1.09874
