# Supplementary material for: Potential short-term losses of N 2 O and N 2 from high concentrations of biogas digestate in arable soils
Source: Copernicus journal article supplement (doi:10.5194/soil-3-161-2017), 2017-09-28
Supplement: Supplementary file 1 [file soil-3-161-2017-supplement.zip › Fig5_ratio.xlsx]

## Sheet: Tabelle1
soil	day	kg.N.ha	wfps	mean	sd
Clayey silt	2	0	35	0	NA
Clayey silt	2	160	35	NA	NA
Clayey silt	2	320	35	0	NA
Clayey silt	2	0	55	0.7953	0.0347753
Clayey silt	2	160	55	0.341849	0.208127
Clayey silt	2	320	55	0.515246	0.0809975
Clayey silt	2	0	75	0.782278	0.0839407
Clayey silt	2	160	75	0.524496	0.0709323
Clayey silt	2	320	75	0.559914	0.0334623
Clayey silt	4	0	35	NA	NA
Clayey silt	4	160	35	NA	NA
Clayey silt	4	320	35	0	0
Clayey silt	4	0	55	0.596486	0.07624
Clayey silt	4	160	55	0.320081	0.0173926
Clayey silt	4	320	55	0.484345	0.134182
Clayey silt	4	0	75	0.550204	0.0804649
Clayey silt	4	160	75	0.588222	0.167356
Clayey silt	4	320	75	0.613495	0.0683326
Clayey silt	5	0	35	NA	NA
Clayey silt	5	160	35	NA	NA
Clayey silt	5	320	35	0.133468	0.0145451
Clayey silt	5	0	55	0.954225	0.00106599
Clayey silt	5	160	55	0.641411	0.0802706
Clayey silt	5	320	55	0.781818	0.141417
Clayey silt	5	0	75	0.959282	0.00993552
Clayey silt	5	160	75	0.720843	0.0970511
Clayey silt	5	320	75	0.877466	0.0213572
Loamy sand	2	0	35	0	0
Loamy sand	2	160	35	0	0
Loamy sand	2	320	35	0	0
Loamy sand	2	0	55	0	0
Loamy sand	2	160	55	0	NA
Loamy sand	2	320	55	0	NA
Loamy sand	2	0	75	0	NA
Loamy sand	2	160	75	0	0
Loamy sand	2	320	75	0	NA
Loamy sand	4	0	35	0	0
Loamy sand	4	160	35	0.300644	0.52073
Loamy sand	4	320	35	0	0
Loamy sand	4	0	55	0.325274	0.563392
Loamy sand	4	160	55	0	0
Loamy sand	4	320	55	0.911326	0.0699936
Loamy sand	4	0	75	0	0
Loamy sand	4	160	75	0	0
Loamy sand	4	320	75	0	0
Loamy sand	5	0	35	0.985262	0.00304949
Loamy sand	5	160	35	NA	NA
Loamy sand	5	320	35	0.962264	0.00516427
Loamy sand	5	0	55	0.986691	0.00280538
Loamy sand	5	160	55	NA	NA
Loamy sand	5	320	55	0.967819	0.0118345
Loamy sand	5	0	75	0.890289	0.121486
Loamy sand	5	160	75	NA	NA
Loamy sand	5	320	75	NA	NA
