# Supplementary material for: Potential short-term losses of N 2 O and N 2 from high concentrations of biogas digestate in arable soils
Source: Copernicus journal article supplement (doi:10.5194/soil-3-161-2017), 2017-09-28
Supplement: Supplementary file 1 [file soil-3-161-2017-supplement.zip › Fig6_DOCvsCO2.xlsx]

## Sheet: co2.doc
soil	wfps	kg.N.ha	co2.mean	co2.sd	co2.fit	co2.lwr.ci	co2.upr.ci	doc.mean	doc.sd
Clayey silt	35	0	0.3698	0.0373848	0.897873	0.277234	1.52833	1.89	0.107977
Clayey silt	35	320	5.05	0.932132	7.08542	6.33513	7.83571	35.8067	2.65804
Clayey silt	55	0	0.1628	0.0596535	0.919795	0.296207	1.54338	1.98333	0.14593
Clayey silt	55	160	2.763	0.193508	1.58758	1.03487	2.14029	5.64667	0.854227
Clayey silt	55	320	1.518	0.0317387	2.28636	1.79156	2.78116	9.48	1.37338
Clayey silt	75	0	0.2032	0.0296998	0.905212	0.279944	1.53048	1.90333	0.17793
Clayey silt	75	160	1.103	0.178918	1.70971	1.16849	2.25094	6.31667	0.970016
Clayey silt	75	320	2.088	0.0739272	2.48809	2.00604	2.97014	10.5867	1.49203
Loamy sand	35	0	1.913	0.056414	1.31354	0.733285	1.89379	4.14333	0.27564
Loamy sand	35	160	5.082	0.118309	4.15603	3.69101	4.62106	19.7367	2.09451
Loamy sand	35	320	6.289	0.124864	6.33317	5.67872	6.98762	31.68	2.56082
Loamy sand	55	0	1.86	0.0482776	1.26128	0.675517	1.84705	3.85667	0.309104
Loamy sand	55	160	5.038	0.12911	4.03147	3.57093	4.49201	19.0533	1.94684
Loamy sand	55	320	7.137	0.105387	6.2554	5.61027	6.90052	31.2533	1.44424
Loamy sand	75	0	1.687	0.10448	1.35425	0.778235	1.93027	4.36667	0.145462
Loamy sand	75	160	6.924	0.142146	7.16137	6.40092	7.92182	36.2233	4.05
Loamy sand	75	320	10.2	0.458193	9.67453	8.54883	10.8002	50.01	3.37353
