# Supplementary material for: Potential short-term losses of N 2 O and N 2 from high concentrations of biogas digestate in arable soils
Source: Copernicus journal article supplement (doi:10.5194/soil-3-161-2017), 2017-09-28
Supplement: Supplementary file 1 [file soil-3-161-2017-supplement.zip › Fig7_CO2vsN2O.xlsx]

## Sheet: co2.doc
soil	wfps	kg.N.ha	n2o.mean	n2o.sd	n2o.fit	n2o.lwr.ci	n2o.upr.ci	co2.mean	co2.sd
Clayey silt	55	0	0.152	0.00334887	0.16105	0.113381	0.20872	0.1628	0.0596535
Clayey silt	55	160	0.407	0.0196921	0.40739	0.351628	0.463151	2.763	0.193508
Clayey silt	55	320	0.3033	0.00603483	0.289387	0.258296	0.320477	1.518	0.0317387
Clayey silt	75	0	0.1568	0.00904363	0.164391	0.117589	0.211192	0.2032	0.0296998
Clayey silt	75	160	0.2767	0.0260094	0.250967	0.21998	0.281954	1.103	0.178918
Clayey silt	75	320	0.3194	0.0211542	0.343515	0.304122	0.382908	2.088	0.0739272
