# Supplementary material for: Potential short-term losses of N 2 O and N 2 from high concentrations of biogas digestate in arable soils
Source: Copernicus journal article supplement (doi:10.5194/soil-3-161-2017), 2017-09-28
Supplement: Supplementary file 1 [file soil-3-161-2017-supplement.zip › soil-3-161-2017-supplement-title-page.pdf]

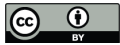

## *Supplement of*

# **Potential short-term losses of $\text{N}_2\text{O}$ and $\text{N}_2$ from high concentrations of biogas digestate in arable soils**

**Sebastian Rainer Fiedler et al.**

*Correspondence to:* Sebastian Rainer Fiedler ([sebastian.fiedler@uni-rostock.de](mailto:sebastian.fiedler@uni-rostock.de))

- [soil-3-161-2017-supplement-title-page.pdf](#)
- [Fig2\\_Nmin.xlsx](#)
- [Fig3\\_N2O.xlsx](#)
- [Fig4\\_N2.xlsx](#)
- [Fig5\\_ratio.xlsx](#)
- [Fig6\\_DOCvsCO2.xlsx](#)
- [Fig7\\_CO2vsN2O.xlsx](#)

The copyright of individual parts of the supplement might differ from the CC BY 3.0 License.
